# Supplementary material
Source: MDPI journal article supplement (https://www.mdpi.com/2297-8739/8/12/233)
Supplement: s1 [file s1]

**Table S1.** Performance characteristics of the HPLC-MS method applicable to polyphenolic compounds evaluation in red wine samples

| Compound              |                        | t <sub>R</sub><br>minutes | [M-H] <sup>-</sup> or<br>[M-H] <sup>+</sup> | Linear regression equation<br>(µg/mL) | R      | LoD<br>(µg/mL) | Linear dynamic range<br>(µg/mL) |
|-----------------------|------------------------|---------------------------|---------------------------------------------|---------------------------------------|--------|----------------|---------------------------------|
| <i>Phenolic acids</i> | Ellagic acid           | 32.59                     | 301                                         | A=2398123XC+1175030                   | 0.9991 | 0.07           | 0.5-50                          |
|                       | Gallic acid            | 9.98                      | 169                                         | A=689930.8X+134840.1                  | 0.9999 | 0.07           | 0.5-20                          |
|                       | Caffeic acid           | 27.38                     | 179                                         | A=2056685XC+2246518                   | 0.9981 | 0.09           | 0.5-20                          |
| <i>Flavonols</i>      | Myricetin              | 36.91                     | 317                                         | A=4868453XC+3269227                   | 0.9996 | 0.07           | 0.5-20                          |
|                       | Quercetin              | 42.45                     | 301                                         | A=2863002XC+4792247                   | 0.9926 | 0.06           | 0.5-20                          |
|                       | Rutin                  | 30.87                     | 609                                         | A=1723929XC+3484146                   | 0.9992 | 0.07           | 0.5-30                          |
| <i>Flavan-3-ols</i>   | Epicatechin            | 27.35                     | 289                                         | A= 557658.8XC+366124.2                | 0.9997 | 0.10           | 0.5-20                          |
|                       | (-) Catechin           | 5.6                       | 289                                         | A=458292.9XC+128311.8                 | 0.9994 | 0.18           | 1-50                            |
| <i>Flavones</i>       | Luteolin               | 41.73                     | 285                                         | A=10551697XC+23269050                 | 0.9962 | 0.07           | 0.5-20                          |
| <i>Anthocyanin</i>    | Peonidin 3-O-glucoside | 19.38                     | 463                                         | A=749868.5xC-159194.9                 | 0.9982 | 0.25           | 1-50                            |
| <i>Anthocyanidins</i> | Delphinidin            | 19.79                     | 303                                         | A=552610.3xC-328315                   | 0.9989 | 0.15           | 1-50                            |
|                       | Pelargonidin           | 25.42                     | 271                                         | A=2030934xC+1125109                   | 0.9941 | 0.18           | 1-50                            |
|                       | Malvidin               | 26.94                     | 331                                         | A=970912.1xC-203550.3                 | 0.9986 | 0.21           | 1-50                            |
|                       | Cyanidin               | 22.49                     | 287                                         | A=1075267xC+250397.3                  | 0.9972 | 0.10           | 1-50                            |

t<sub>R</sub> – retention time; A - area; C – concentration; R – correlation coefficient; LoD – limit of detection; n=3
